# Supplementary material
Source: PubMed Central journal article supplement (PMC7545924)
Supplement: 12931_2020_1476_MOESM3_ESM.pdf [file 12931_2020_1476_MOESM3_ESM.pdf]

### Supplemental figure 1: Study protocol diagram.

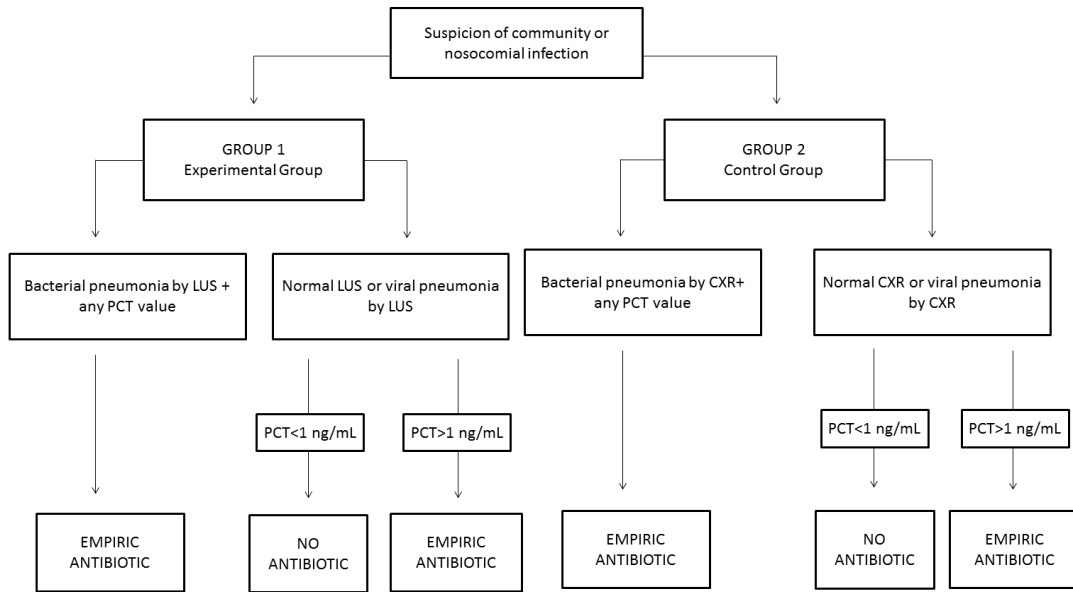

CXR: Chest X-ray; LUS: Lung Ultrasound; PCT: Procalcitonin.
